# Supplementary material for: Soil water depletion patterns in rainfed apple orchards and wheat fields
Source: PeerJ journal article supplement (doi:10.7717/peerj.15098), 2023-03-30
Supplement: EditingCertificate.pdf [file EditingCertificate.pdf]

# LANGUAGE EDITING CERTIFICATE

This document certifies that the manuscript listed below was edited for proper English language, grammar, punctuations, spelling, and overall style by one or more of the highly qualified native English speaking editors at eWin Editing Services.

## Manuscript Title:

Soil water depletion patterns in rain-fed apple orchards and wheat fields

## Authors:

Lu Zhang et al.

## Date Issued:

January 31, 2023

## Certificate Number:

TEC2002530OPDA0131

**Disclaimer:** This document certifies that the manuscript listed above was edited for proper English language, grammar, punctuation, spelling, and overall style. Neither the research content nor the author's intentions were altered in any way during the editing process. Documents receiving this certification should be English-ready for publication. However, the author has the ability to accept or reject our suggestions and changes. We do not bear responsibility for revisions made to the document after our edit. If you have any questions or concerns about this document or certification, please contact [info@ewinediting.com](mailto:info@ewinediting.com).

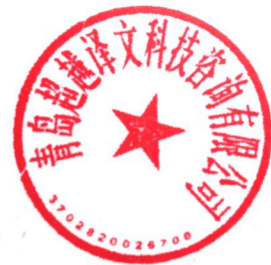

Transcend Envirotech Consulting  
Qingdao, China
